# Supplementary material for: Chitosan-Modified Biochar and Unmodified Biochar for Methyl Orange: Adsorption Characteristics and Mechanism Exploration
Source: MDPI journal article supplement (doi:10.3390/toxics10090500), 2022-08-27
Supplement: s1 [file s1]

Article

# Chitosan-Modified Biochar and Unmodified Biochar for Methyl Orange: Adsorption Characteristics and Mechanism Exploration

Nguyen Xuan Loc <sup>1,†</sup>, Phan Thi Thanh Tuyen <sup>1</sup>, Le Chi Mai <sup>2</sup> and Do Thi My Phuong <sup>2,\*,†</sup>

<sup>1</sup> Department of Environmental Sciences, College of the Environment and Natural Resources, Can Tho University, Can Tho 900000, Vietnam

<sup>2</sup> Department of Environmental Engineering, College of the Environment and Natural Resources, Can Tho University, Can Tho 900000, Vietnam

\* Correspondence: dtmphuong@ctu.edu.vn; Tel.: +84-91-918-8834

† These authors contributed equally to this work.

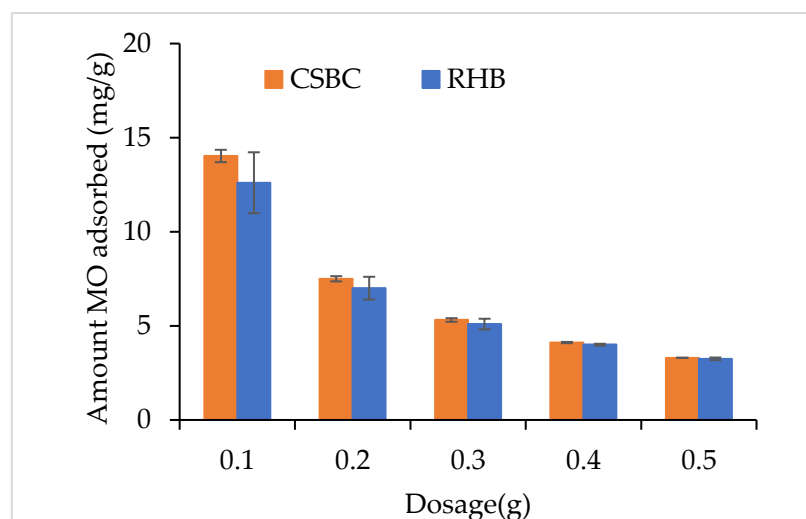

**Figure S1.** The effects of RHB and CSBC dosage on MO adsorption.

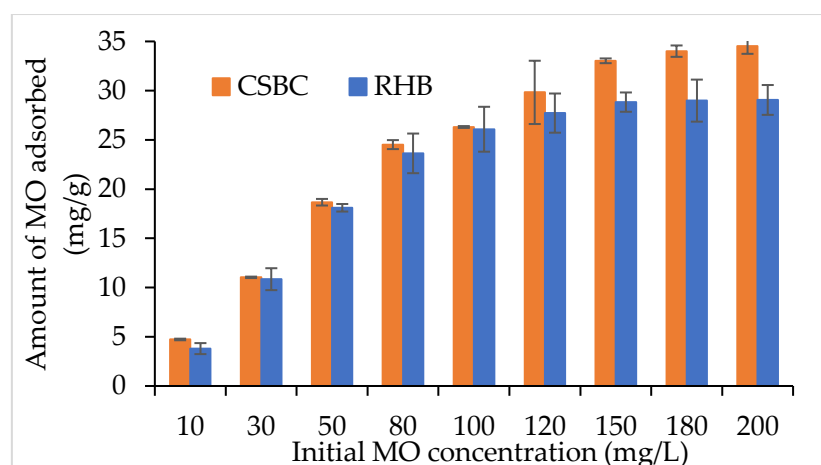

**Figure S2.** The effects of initial MO concentration on adsorption by RHB and CSBC.

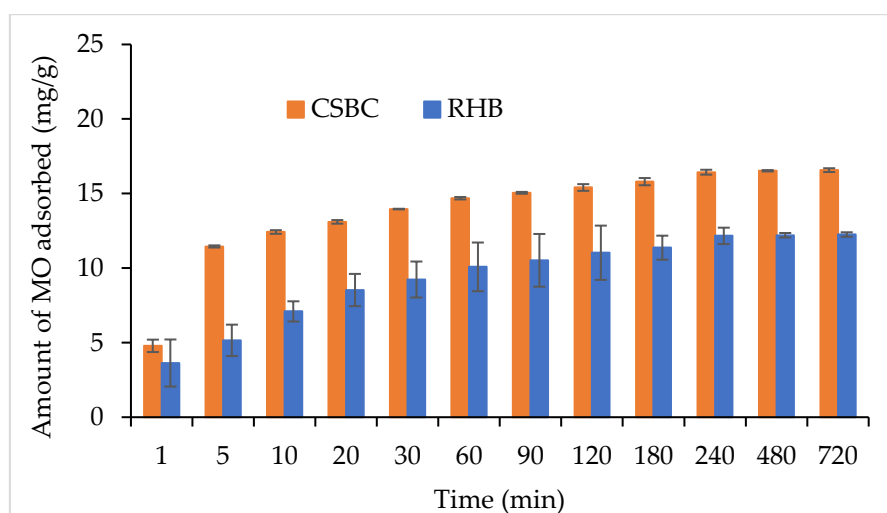

**Figure S3.** The effects of contact time on MO adsorption onto RHB and CSBC.
